# Supplementary material for: The Functional Significance of Affect Recognition, Neurocognition, and Clinical Symptoms in Schizophrenia
Source: PubMed Central journal article supplement (PMC5242509; doi:10.1371/journal.pone.0170114), 2017-01-18
Supplement: pone.0170114.s002.pdf [file pone.0170114.s002.pdf]

|                     |               | SFS_total | Age   | Edu_yr | FER_d' | CPT_d' | WCST_category | DigSp | SPM   | PANS_sum |
|---------------------|---------------|-----------|-------|--------|--------|--------|---------------|-------|-------|----------|
| Pearson Correlation | SFS_total     | 1.000     | -.245 | .410   | .120   | -.338  | .184          | .244  | .378  | -.130    |
|                     | Age           | -.245     | 1.000 | .060   | -.137  | .062   | -.297         | .065  | -.076 | -.069    |
|                     | Edu_yr        | .410      | .060  | 1.000  | .258   | .103   | .528          | .169  | .272  | -.167    |
|                     | FER_d'        | .120      | -.137 | .258   | 1.000  | -.148  | .324          | .302  | .429  | -.196    |
|                     | CPT_d'        | -.338     | .062  | .103   | -.148  | 1.000  | .095          | .186  | -.055 | -.230    |
|                     | WCST_category | .184      | -.297 | .528   | .324   | .095   | 1.000         | .116  | .288  | -.320    |
|                     | DigSp         | .244      | .065  | .169   | .302   | .186   | .116          | 1.000 | .487  | -.582    |
|                     | SPM           | .378      | -.076 | .272   | .429   | -.055  | .288          | .487  | 1.000 | -.477    |
|                     | PANS_sum      | -.130     | -.069 | -.167  | -.196  | -.230  | -.320         | -.582 | -.477 | 1.000    |
| Sig. (1-tailed)     | SFS_total     | .         | .019  | .000   | .157   | .002   | .061          | .019  | .001  | .139     |
|                     | Age           | .019      | .     | .309   | .126   | .303   | .006          | .294  | .263  | .283     |
|                     | Edu_yr        | .000      | .309  | .      | .014   | .194   | .000          | .078  | .010  | .081     |
|                     | FER_d'        | .157      | .126  | .014   | .      | .107   | .003          | .005  | .000  | .049     |
|                     | CPT_d'        | .002      | .303  | .194   | .107   | .      | .214          | .059  | .322  | .026     |
|                     | WCST_category | .061      | .006  | .000   | .003   | .214   | .             | .165  | .007  | .003     |
|                     | DigSp         | .019      | .294  | .078   | .005   | .059   | .165          | .     | .000  | .000     |
|                     | SPM           | .001      | .263  | .010   | .000   | .322   | .007          | .000  | .     | .000     |
|                     | PANS_sum      | .139      | .283  | .081   | .049   | .026   | .003          | .000  | .000  | .        |
